# Supplementary material for: Depression, anxiety, and burnout among medical students and residents of a medical school in Nepal: a cross-sectional study
Source: Springer Nature journal article supplement (doi:10.1186/s12888-020-02645-6), 2020-06-15
Supplement: MOESM1 [file 18084384]

# Depression, anxiety and burnout among medical students and residents of a medical school in Nepal

## Consent form

Dear participant, we invite you to participate in a research study entitled “**Depression, anxiety and burnout among medical students and residents of a Medical School in Nepal.**” The purpose of this research is to determine the prevalence of above-mentioned mental health problems among medical students and residents. The enclosed questionnaire has been designed to collect symptoms of depression, anxiety and burnout including information on your sociodemographic profile.

Your participation in this research is completely voluntary. You may decline altogether, or leave blank questions you do not wish to answer. There are no known risks of discomforts associated with this survey. Your responses will be kept strictly confidential, and digital data will be stored in secure computer files after it is entered. Data from this research will be reported only as a collective combine total. Any report of this research that is made available to the public will not include your name or any other individual information by which you could be identified.

If you agree to participate in this study, please answer the questions on the questionnaire as best as you can. It should take approximately 15 minutes to complete. Please return the questionnaire as soon as possible. If you have any questions about this project, feel free to contact Nishan Babu Pokhrel at [nishanpokhrel1@iom.edu.np](mailto:nishanpokhrel1@iom.edu.np). Information on the rights of human subjects in research is available through the Institutional Review Board of Institute of Medicine. Email: [irb@iom.edu.np](mailto:irb@iom.edu.np).

Completing this survey indicates that you are 18 years of age or older and that you have provided your consent to participate in this research.

Thank you for your assistance in this important endeavor.

Yours.

Nishan Babu Pokhrel, MBBS (Principal Investigator)  
Ramesh Khadayat, MBBS (Co-principal investigator)

Please take a few minutes to fill out this survey. Your answers will be kept confidential. Thank you for the participation.

| SECTION I                                              |                                                                                                                                                                                                                                                                                                                                                                                                                                   |
|--------------------------------------------------------|-----------------------------------------------------------------------------------------------------------------------------------------------------------------------------------------------------------------------------------------------------------------------------------------------------------------------------------------------------------------------------------------------------------------------------------|
| Socio-demographic information                          |                                                                                                                                                                                                                                                                                                                                                                                                                                   |
| 1.                                                     | Age:                                                                                                                                                                                                                                                                                                                                                                                                                              |
| 2.                                                     | Gender: <input type="checkbox"/> Male <input type="checkbox"/> Female                                                                                                                                                                                                                                                                                                                                                             |
| 3.                                                     | Year of medical school: <input type="checkbox"/> First <input type="checkbox"/> second <input type="checkbox"/> Third <input type="checkbox"/> Fourth year <input type="checkbox"/> Final year <input type="checkbox"/> Intern<br><input type="checkbox"/> Resident (____ year)<br>If you are resident, please mention whether you are: <input type="checkbox"/> Clinical<br><input type="checkbox"/> Non-clinical/ Basic science |
| 4.                                                     | Were you enrolled fresh in this medical school?<br><input type="checkbox"/> yes <input type="checkbox"/> No                                                                                                                                                                                                                                                                                                                       |
| 5.                                                     | <b>If not</b> , how many years have been lost after 10+2/ISc before you were enrolled in this medical school?<br>_____years.                                                                                                                                                                                                                                                                                                      |
| 6.                                                     | Religion: <input type="checkbox"/> Hindu <input type="checkbox"/> Buddhism <input type="checkbox"/> Muslim <input type="checkbox"/> Christian <input type="checkbox"/> Others (please specify) _____                                                                                                                                                                                                                              |
| 7.                                                     | Nationality: <input type="checkbox"/> Nepali <input type="checkbox"/> Indian <input type="checkbox"/> Others (Please specify) _____                                                                                                                                                                                                                                                                                               |
| 8.                                                     | Where do you stay? <input type="checkbox"/> At home <input type="checkbox"/> Rented room <input type="checkbox"/> Hostel <input type="checkbox"/> Others (specify) _____                                                                                                                                                                                                                                                          |
| 9.                                                     | Relationship status: <input type="checkbox"/> Married <input type="checkbox"/> Non-married partner <input type="checkbox"/> Single <input type="checkbox"/> Divorced                                                                                                                                                                                                                                                              |
| 10.                                                    | Children: <input type="checkbox"/> Yes (no of children)_____ <input type="checkbox"/> None                                                                                                                                                                                                                                                                                                                                        |
| 11.                                                    | What is the average monthly income of your <b>FAMILY</b> ?<br><input type="checkbox"/> ≥ 46,000 (NRs)<br><input type="checkbox"/> 23, 000- 46, 000 (NRs)<br><input type="checkbox"/> 17, 000- 23, 000 (NRs)<br><input type="checkbox"/> 11, 000- 17, 000 (NRs)<br><input type="checkbox"/> 7, 000- 11, 000 (NRs)<br><input type="checkbox"/> 2,000- 7, 000 (NRs)<br><input type="checkbox"/> ≤ 2, 000 (NRs)                       |
| SECTION II                                             |                                                                                                                                                                                                                                                                                                                                                                                                                                   |
| 12.                                                    | Do you smoke <i>cigarettes</i> ? <input type="checkbox"/> YES <input type="checkbox"/> NO                                                                                                                                                                                                                                                                                                                                         |
| <b>If you check "NO" then continue to question 25.</b> |                                                                                                                                                                                                                                                                                                                                                                                                                                   |
| 13.                                                    | When did you start <i>smoking</i> ? <input type="checkbox"/> Before joining medical school<br><input type="checkbox"/> After joining medical school                                                                                                                                                                                                                                                                               |
| 14.                                                    | If you started smoking before joining medical school, did the frequency increase or decrease after joining medical school? <input type="checkbox"/> Increase <input type="checkbox"/> Decrease                                                                                                                                                                                                                                    |
| 15.                                                    | Do you smoke <i>marijuana</i> ? <input type="checkbox"/> YES <input type="checkbox"/> NO                                                                                                                                                                                                                                                                                                                                          |
| <b>If you check "NO" then continue to question 28.</b> |                                                                                                                                                                                                                                                                                                                                                                                                                                   |
| 16.                                                    | When did you start using <i>marijuana</i> ? <input type="checkbox"/> Before joining medical school<br><input type="checkbox"/> After joining medical school                                                                                                                                                                                                                                                                       |

|                                                 |                                                                                                                                    |                                                                                                                 |                                   |
|-------------------------------------------------|------------------------------------------------------------------------------------------------------------------------------------|-----------------------------------------------------------------------------------------------------------------|-----------------------------------|
| 17.                                             | If you started using marijuana before joining medical school, did the frequency increase or decrease after joining medical school? | <input type="checkbox"/> Increase                                                                               | <input type="checkbox"/> Decrease |
| 18.                                             | Do you drink <i>alcohol</i> ?                                                                                                      | <input type="checkbox"/> YES                                                                                    | <input type="checkbox"/> NO       |
| If you check "NO" then continue to question 31. |                                                                                                                                    |                                                                                                                 |                                   |
| 19.                                             | When did you start drinking <i>alcohol</i> ?                                                                                       | <input type="checkbox"/> Before joining medical school<br><input type="checkbox"/> After joining medical school |                                   |
| 20.                                             | If you started using alcohol before joining medical school, did the frequency increase or decrease after joining medical school?   | <input type="checkbox"/> Increase                                                                               | <input type="checkbox"/> Decrease |
| 21.                                             | Have the thoughts of <i>committing suicide</i> came in your mind while in medical school?                                          | <input type="checkbox"/> YES                                                                                    | <input type="checkbox"/> NO       |
| 22.                                             | Have you considered <i>dropping out</i> of medical school in past month?                                                           | <input type="checkbox"/> YES                                                                                    | <input type="checkbox"/> NO       |

**23. SECTION III:** Please tick (✓) in the box below, for which you feel is the most appropriate answer.

**\* If you are not in clinical year yet, please answer based on what do you feel if you face this situation**

| Questions |                                                                               | Answers               |                  |           |                 |                      |
|-----------|-------------------------------------------------------------------------------|-----------------------|------------------|-----------|-----------------|----------------------|
|           |                                                                               | Always                | Often            | Sometimes | Seldom /Rarely  | Never/Almost never   |
| 1         | How often do you feel tired?                                                  |                       |                  |           |                 |                      |
| 2         | How often are you physically exhausted?                                       |                       |                  |           |                 |                      |
| 3.        | How often are you emotionally exhausted?                                      |                       |                  |           |                 |                      |
| 4.        | How often do you think: "I can't take it                                      |                       |                  |           |                 |                      |
| 5.        | How often do you feel worn out?                                               |                       |                  |           |                 |                      |
| 6.        | How often do you feel weak and susceptible to                                 |                       |                  |           |                 |                      |
| 7.        | Do you feel worn out at the end of the                                        |                       |                  |           |                 |                      |
| 8.        | Are you exhausted in the morning at the thought of another day at work/study? |                       |                  |           |                 |                      |
| 9.        | Do you feel that every working/studying hour is                               |                       |                  |           |                 |                      |
| 10.       | <b>Do you have enough energy for family and friends during leisure time?</b>  |                       |                  |           |                 |                      |
| 18.       | Are you tired of working with patients?                                       |                       |                  |           |                 |                      |
| 19.       | Do you sometimes wonder how long you will be                                  |                       |                  |           |                 |                      |
|           |                                                                               | To a very high degree | To a high degree | Somewhat  | To a low degree | To a very low degree |
| 11.       | Is your work/study emotionally exhausting?                                    |                       |                  |           |                 |                      |
| 12.       | Does your work/study frustrate you?                                           |                       |                  |           |                 |                      |
| 13.       | Do you feel burnt out because of your                                         |                       |                  |           |                 |                      |
| 14.       | Do you find hard to work with patients?                                       |                       |                  |           |                 |                      |
| 15.       | Does it drain your energy to work with patients?                              |                       |                  |           |                 |                      |
| 16.       | Do you find it frustrating to work with patients?                             |                       |                  |           |                 |                      |
| 17.       | Do you feel that you give more than you get back when you work with patients? |                       |                  |           |                 |                      |

## 24. SECTION IV

From the listed items below, please rate them according to the following:

0 = causing no stress at all, 1 = causing mild stress, 2 = causing moderate stress, 3 = causing high stress, 4 = causing severe stress

*\* If you are not in clinical year yet, please answer based on what do you feel if you face this situation.*

|    | Items                                        | How do you rate it? |   |   |   |   |
|----|----------------------------------------------|---------------------|---|---|---|---|
|    |                                              | 0                   | 1 | 2 | 3 | 4 |
| 1  | Tests/examinations                           |                     |   |   |   |   |
| 2  | Falling behind in reading schedule           |                     |   |   |   |   |
| 3  | Large amount of content to be learnt         |                     |   |   |   |   |
| 4  | Lack of time to review what have been learnt |                     |   |   |   |   |
| 5  | Heavy workload                               |                     |   |   |   |   |
| 6  | Participation in class presentation          |                     |   |   |   |   |
| 7  | Need to do well (imposed by others)          |                     |   |   |   |   |
| 8  | Feeling of incompetence                      |                     |   |   |   |   |
| 9  | Unable to answer questions from patients*    |                     |   |   |   |   |
| 10 | Talking to patients about personal problems* |                     |   |   |   |   |
| 11 | Facing illness or death of the patients*     |                     |   |   |   |   |
| 12 | Verbal or physical abuse by other student(s) |                     |   |   |   |   |
| 13 | Verbal or physical abuse by teacher(s)       |                     |   |   |   |   |
| 14 | Verbal or physical abuse by personnel(s)     |                     |   |   |   |   |
| 15 | Conflict with teacher(s)                     |                     |   |   |   |   |
| 16 | Unwillingness to study medicine              |                     |   |   |   |   |
| 17 | Parental wish for you to study medicine      |                     |   |   |   |   |
| 18 | Not enough feedback from teacher (s)         |                     |   |   |   |   |
| 19 | Uncertainty of what is expected of me        |                     |   |   |   |   |
| 20 | Lack of recognition for work done            |                     |   |   |   |   |

**Verbal Abuse** is defined as to speak insultingly, harshly and unjustly about a person.

**Physical Abuse** is defined as to treat in harmful, injurious or offensive way to a person.

## 25. Section V: Please tick (✓) the most appropriate option.

**Tick** the box beside the reply that is closest to how you have been feeling in the past week.  
Don't take too long over you replies: **your immediate is best.**

|                                                                                                                                                                                                                                                           |                                                                                                                                                                                                                                                     |
|-----------------------------------------------------------------------------------------------------------------------------------------------------------------------------------------------------------------------------------------------------------|-----------------------------------------------------------------------------------------------------------------------------------------------------------------------------------------------------------------------------------------------------|
| <p>A<sub>1</sub>- म आफूलाई तनावमा पाउँछु:</p> <ol style="list-style-type: none"> <li>३. प्रायःजसो</li> <li>२. धेरै पटक</li> <li>१. समय समयमा</li> <li>०. कहिल्यै पनि हुन्न</li> </ol>                                                                     | <p>D<sub>4</sub>- म शिथिल भएको महसुस गर्दछु:</p> <ol style="list-style-type: none"> <li>३. प्रायः सधैंजसो समय</li> <li>२. बारम्बार</li> <li>१. कहिलेकाहीं</li> <li>०. कहिल्यै पनि हुन्न</li> </ol>                                                  |
| <p>D<sub>1</sub>- म अबै पनि आफूलाई मन पर्ने चीजमा खुशी पाउँछु:</p> <ol style="list-style-type: none"> <li>०. पक्कै पनि धेरैपटक</li> <li>१. त्यति धेरै होइन</li> <li>२. अलि अलि</li> <li>३. कहिल्यै पनि हुन्न/विरलै</li> </ol>                             | <p>A<sub>5</sub>- म डर लागेजस्तो भएर मन सिरिङ्ग गरिरहेको अनुभव गर्दछु:</p> <ol style="list-style-type: none"> <li>०. कहिल्यै पनि होइन</li> <li>१. कहिलेकाहीं</li> <li>२. अत्यधिक मात्रामा</li> <li>३. सधैंजसो</li> </ol>                            |
| <p>A<sub>2</sub>- म केही डरलाग्दो घटना घट्ला कि भनेर डराउँछु:</p> <ol style="list-style-type: none"> <li>३. एकदमै नराम्रो सँग</li> <li>२. हो, तर त्यति नराम्रोसँग होइन</li> <li>१. अलि अलि तर त्यति चिन्तित गराउँदैन</li> <li>०. पटककै लाग्दैन</li> </ol> | <p>D<sub>5</sub>- मेरो आफ्नो रंगरूपमा रुचि घटिरहेको छ:</p> <ol style="list-style-type: none"> <li>३. अवश्य नै</li> <li>२. जति लिनुपर्ने हो त्यति लिन्न</li> <li>१. त्यति रुचि नदिन सक्छु</li> <li>०. पहिले जस्तै चासो राख्छु</li> </ol>             |
| <p>D<sub>2</sub>- म कुनै पनि कुराको रमाइलो पक्षलाई देखेर हाँस गर्न सक्छु:</p> <ol style="list-style-type: none"> <li>०. पहिले जति नै</li> <li>१. अहिले त्यति धेरै होइन</li> <li>२. पक्कै तर पहिले जस्तो होइन</li> <li>३. हुँदैन हुन्न</li> </ol>          | <p>A<sub>6</sub>- म सधैं छटपटी/अशान्त जस्तो अनुभव गर्दछु:</p> <ol style="list-style-type: none"> <li>३. वास्तवमा धेरै नै</li> <li>२. अलि बढी</li> <li>१. त्यति बढी होइन</li> <li>०. हुँदैन होइन</li> </ol>                                          |
| <p>A<sub>3</sub>- चिन्ताजनक विचारहरु मेरो दिमागमा आउँछन्:</p> <ol style="list-style-type: none"> <li>३. अत्यधिक मात्रामा</li> <li>२. धेरैजसो</li> <li>१. कहिलेकाहीं तर त्यति धेरै आउँदैन</li> <li>०. विरलै</li> </ol>                                     | <p>D<sub>6</sub>- म जहिले पनि रमाइलो गर्न मनोरञ्जनको प्रतीक्षामा हुन्छु:</p> <ol style="list-style-type: none"> <li>०. पहिले जस्तो नै</li> <li>१. पहिले भन्दा अलि कम</li> <li>२. पक्कै पनि पहिले भन्दा थोरै</li> <li>३. कहिल्यै पनि होइन</li> </ol> |
| <p>D<sub>3</sub>- म आफूलाई सन्तुष्ट अनुभव गरिरहेको छु:</p> <ol style="list-style-type: none"> <li>३. कहिल्यै पनि हुन्न</li> <li>२. प्रायः हुन्न</li> <li>१. कहिलेकाहीं</li> <li>०. धेरैजसो समय</li> </ol>                                                 | <p>A<sub>7</sub>- म कहिलेकाहीं एकदमै अतालिनछु:</p> <ol style="list-style-type: none"> <li>३. वास्तवमा धेरै नै</li> <li>२. प्रायः जसो</li> <li>१. त्यति धेरै होइन</li> <li>०. हुँदैन होइन</li> </ol>                                                 |
| <p>A<sub>4</sub>- म हुक्क एवं निश्चिन्त बस्न सक्छु:</p> <ol style="list-style-type: none"> <li>०. पक्कै पनि/अवश्य</li> <li>१. प्रायःजसो</li> <li>२. कहिलेकाहीं</li> <li>३. हुँदैन हुन्न</li> </ol>                                                        | <p>D<sub>7</sub>- म गफगाफ, रेडियो, किताब, टि.भी, भिडियोजस्ता कार्यक्रममा रमाउँछु:</p> <ol style="list-style-type: none"> <li>०. प्रायः</li> <li>१. कहिलेकाहीं</li> <li>२. त्यति धेरै होइन</li> <li>३. विरलै</li> </ol>                              |

Please check you have answered all the questions.

## SECTION VI

| Personal information |                                                                    |                                                                                                                                                                                                                                                                                                                          |                             |
|----------------------|--------------------------------------------------------------------|--------------------------------------------------------------------------------------------------------------------------------------------------------------------------------------------------------------------------------------------------------------------------------------------------------------------------|-----------------------------|
| 26.                  | Relationship <u>problem</u> with family/friends                    | <input type="checkbox"/> YES                                                                                                                                                                                                                                                                                             | <input type="checkbox"/> NO |
| 27.                  | Did you suffer from mental disorders in the past?                  | <input type="checkbox"/> YES                                                                                                                                                                                                                                                                                             | <input type="checkbox"/> NO |
| 28.                  | Have you consulted the specialist regarding this?                  | <input type="checkbox"/> YES                                                                                                                                                                                                                                                                                             | <input type="checkbox"/> NO |
| 29.                  | Would you like to consult specialist regarding your problem?       | <input type="checkbox"/> YES                                                                                                                                                                                                                                                                                             | <input type="checkbox"/> NO |
| 30.                  | Are you currently receiving treatment for the mental health issue? | <input type="checkbox"/> YES                                                                                                                                                                                                                                                                                             | <input type="checkbox"/> NO |
| 31.                  | History of mental disorders in family:                             | <input type="checkbox"/> YES                                                                                                                                                                                                                                                                                             | <input type="checkbox"/> NO |
| 32.                  | Are you satisfied with your academic performance?                  | <input type="checkbox"/> YES                                                                                                                                                                                                                                                                                             | <input type="checkbox"/> NO |
| 33.                  | Are you satisfied with your career choice?                         | <input type="checkbox"/> YES                                                                                                                                                                                                                                                                                             | <input type="checkbox"/> NO |
| 34.                  | How frequently do you involve in extracurricular activities?       | <input type="checkbox"/> Always<br><input type="checkbox"/> Often<br><input type="checkbox"/> Sometimes<br><input type="checkbox"/> Rarely<br><input type="checkbox"/> Never                                                                                                                                             |                             |
| 35.                  | How many hours do you sleep in an average day? _____ hours         |                                                                                                                                                                                                                                                                                                                          |                             |
| 36.                  | What is the educational level of the head of your family?          | <input type="checkbox"/> Professional or honors<br><input type="checkbox"/> Graduate or post graduate<br><input type="checkbox"/> Intermediate<br><input type="checkbox"/> High school certificate<br><input type="checkbox"/> Middle school certificate<br><input type="checkbox"/> primary school certificate          |                             |
| 37.                  | What is the occupation of the head of your family?                 | <input type="checkbox"/> Profession<br><input type="checkbox"/> Semi profession<br><input type="checkbox"/> clerical, shop owner or farmer<br><input type="checkbox"/> skilled owner<br><input type="checkbox"/> semi-skilled worker<br><input type="checkbox"/> Unskilled worker<br><input type="checkbox"/> Unemployed |                             |
